# Supplementary material for: Directed functional connectivity using dynamic graphical models
Source: bioRxiv or medRxiv preprint supplement (doi:10.1101/198887), 2018-03-27
Supplement: Supplementary file [file 198887-1.pdf]

# Supplementary Materials

## Supplementary Table S1

**Supplementary Table S1:** Description of the ten resting state networks used.

| Component from HCP parcellation time series from NetMats d25 | Corresponding RSN from Smith et al. (2009) | Spatial correlation (Pearson's $r$ ) | Description (Harvard-Oxford and Cerebellar Atlas)                                                                                                                                          | Label of network (Abbreviation)  |
|--------------------------------------------------------------|--------------------------------------------|--------------------------------------|--------------------------------------------------------------------------------------------------------------------------------------------------------------------------------------------|----------------------------------|
| 1                                                            | 2                                          | .57                                  | Occipital pole                                                                                                                                                                             | Visual occipital (VisOcc)        |
| 2                                                            | 4                                          | .57                                  | precuneus, cingulate g., superior frontal g., middle frontal g., middle temporal g., temporal pole, lateral occipital cortex (c.) hippocampus, frontal orbital c., cerebellum (crus I, II) | Default mode (DMN)               |
| 3                                                            | 1                                          | .63                                  | Lingual gyrus, cuneus, cerebellum (VI), occipital pole, precentral g.                                                                                                                      | Visual medial (VisMed)           |
| 4                                                            | 3                                          | .55                                  | lateral occipital c., temporal occipital fusiform c.                                                                                                                                       | Visual lateral (VisLat)          |
| 5                                                            | 9                                          | .57                                  | Various areas in frontal and parietal c. right                                                                                                                                             | Frontoparietal right (FrontParR) |
| 10                                                           | 10                                         | .53                                  | Frontal and parietal areas left                                                                                                                                                            | Frontoparietal left (FrontParL)  |
| 14                                                           | 6                                          | .39                                  | Precentral g., postcentral g., operculum, cerebellum (V, VI, VIII)                                                                                                                         | Sensorimotor (SensMot)           |
| 18                                                           | 5                                          | .36                                  | Cerebellum (posterior lobe), amygdala, thalamus, hippocampus, cingulate g. (anterior)                                                                                                      | Cerebellar (Cerebell)            |
| 19                                                           | 7                                          | .41                                  | Superior temporal g., operculum, supramarginal g., thalamus, superior frontal g., hippocampus, temporal pole                                                                               | Auditory (Aud)                   |
| 21                                                           | 8                                          | .42                                  | medial frontal areas, anterior cingulate, paracingulate                                                                                                                                    | Executive control (Exec)         |

## Supplementary Table S2

**Supplementary Table S2:** Mean (SD) peak of HRF after stimulus onset in seconds for different interventions and nodes across 50 simulated datasets.

| Simulation name<br>(total offset between nodes) | $\tau$ node 1 and 4 | $\tau$ node 2 and 5 |
|-------------------------------------------------|---------------------|---------------------|
| < 0.4 s                                         | 0.98                | 0.98                |
| 0.4 s                                           | 1.27                | 0.75                |
| 0.8 s                                           | 1.57                | 0.61                |
| 1.1 s                                           | 1.96                | 0.49                |
| 1.4 s                                           | 2.35                | 0.41                |
| 1.7 s                                           | 2.74                | 0.35                |
| 1.9 s                                           | 3.14                | 0.31                |

## Supplementary Table S3

**Supplementary Table S3:** Mean (SD) peak of HRF after stimulus onset in seconds for different interventions and nodes across 50 simulated datasets.

|        | < 0.4 s           | 0.4 s             | 0.8 s             | 1.1 s             | 1.4 s             | 1.7 s             | 1.9 s             |
|--------|-------------------|-------------------|-------------------|-------------------|-------------------|-------------------|-------------------|
| Node 1 | 4.07( $\pm$ 0.25) | 4.30( $\pm$ 0.31) | 4.53( $\pm$ 0.32) | 4.68( $\pm$ 0.31) | 4.90( $\pm$ 0.32) | 5.15( $\pm$ 0.40) | 5.36( $\pm$ 0.45) |
| Node 2 | 4.10( $\pm$ 0.29) | 3.89( $\pm$ 0.31) | 3.76( $\pm$ 0.33) | 3.67( $\pm$ 0.25) | 3.61( $\pm$ 0.25) | 3.57( $\pm$ 0.26) | 3.55( $\pm$ 0.25) |
| Node 3 | 4.18( $\pm$ 0.36) | 4.19( $\pm$ 0.31) | 4.19( $\pm$ 0.31) | 4.19( $\pm$ 0.31) | 4.19( $\pm$ 0.31) | 4.19( $\pm$ 0.31) | 4.19( $\pm$ 0.31) |
| Node 4 | 4.28( $\pm$ 0.30) | 4.47( $\pm$ 0.36) | 4.78( $\pm$ 0.35) | 5.03( $\pm$ 0.31) | 5.13( $\pm$ 0.29) | 5.27( $\pm$ 0.38) | 5.46( $\pm$ 0.42) |
| Node 5 | 4.05( $\pm$ 0.35) | 3.86( $\pm$ 0.25) | 3.71( $\pm$ 0.25) | 3.57( $\pm$ 0.28) | 3.47( $\pm$ 0.25) | 3.43( $\pm$ 0.23) | 3.42( $\pm$ 0.23) |

## Supplementary Table S4

**Supplementary Table S4:** Peak offsets in seconds relative to first simulation (< 0.4 s)

|        | 0.4 s | 0.8 s | 1.1 s | 1.4 s | 1.7 s | 1.9 s |
|--------|-------|-------|-------|-------|-------|-------|
| Node 1 | +0.23 | +0.46 | +0.62 | +0.84 | +1.09 | +1.29 |
| Node 2 | -0.21 | -0.34 | -0.43 | -0.49 | -0.53 | -0.55 |
| Node 3 | +0.01 | +0.01 | +0.01 | +0.01 | +0.01 | +0.01 |
| Node 4 | +0.19 | +0.50 | +0.75 | +0.85 | +0.99 | +1.18 |
| Node 5 | -0.19 | -0.35 | -0.49 | -0.58 | -0.63 | -0.63 |

## Supplementary Table S5

**Supplementary Table S5:** Total offset in seconds between nodes with increased/decreased lags.

|              | 0.4 s | 0.8 s | 1.1 s | 1.4 s | 1.7 s | 1.9 s |
|--------------|-------|-------|-------|-------|-------|-------|
| node 1 and 2 | 0.44  | 0.80  | 1.04  | 1.32  | 1.62  | 1.85  |
| node 4 and 5 | 0.38  | 0.84  | 1.24  | 1.44  | 1.62  | 1.82  |
| node 1 and 5 | 0.43  | 0.81  | 1.10  | 1.42  | 1.71  | 1.93  |
